# Supplementary material for: Use of Biologic or Targeted Synthetic Disease-Modifying Antirheumatic Drugs and Cancer Risk
Source: PubMed Central journal article supplement (PMC11579790; doi:10.1001/jamanetworkopen.2024.46336), 2024-11-20
Supplement: jamanetwopen-e2446336-s001.pdf [file jamanetwopen-e2446336-s001.pdf]

## Supplementary Online Content

Sendaydiego X, Gold LS, Dubreuil M, et al. Use of biologic or targeted synthetic disease-modifying antirheumatic drugs and cancer risk. *JAMA Netw Open*.

2024;7(11):e2446336. doi:10.1001/jamanetworkopen.2024.46336

**eTable 1.** Crude Number and Percentages of Treatment Exposure Switches by Drug Class

**eTable 2.** Number of Incident Cancer Diagnoses per 10,000 Person-Years at Risk (95% CI) by Cancer Type After at Least 90 Days and Within 2 Years of Treatment Exposure by Drug Category

**eTable 3.** Baseline Characteristics of the Matched Cohort Comparing TNFi to Rituximab

**eTable 4.** Median Days to Cancer Diagnosis, Number of Incident Cancer Diagnoses (95% CI) per 10,000 Person-Years at Risk, and Adjusted HR (95% CI) Comparing TNFi to Rituximab

**eFigure 1.** Adjusted Cox Proportional Hazards Curves for Time to Incident Cancer in Those Treated With TNFi Compared to Rituximab

**eTable 5.** Baseline Characteristics of the Matched Cohort Comparing TNFi to Interleukin-6 Inhibitors (IL-6i)

**eTable 6.** Median Days to Cancer Diagnosis, Number of Incident Cancer Diagnoses (95% CI) per 10,000 Person-Years at Risk, and Adjusted HR (95% CI) Comparing TNFi to Interleukin-6 Inhibitors (IL-6i)

**eFigure 2.** Adjusted Cox Proportional Hazards Curves for Time to Incident Cancer in Those Treated With TNFi Compared to Interleukin-6 Inhibitors (IL-6i)

**eTable 7.** Baseline Characteristics of the Matched Cohort Comparing TNFi to Abatacept

**eTable 8.** Median Days to Cancer Diagnosis, Number of Incident Cancer Diagnoses (95% CI) per 10,000 Person-Years at Risk, and Adjusted HR (95% CI) Comparing TNFi to Abatacept

**eFigure 3.** Adjusted Cox Proportional Hazards Curves for Time to Incident Cancer in Those Treated With TNFi Compared to Abatacept

**eTable 9.** Baseline Characteristics of the Matched Cohort Comparing TNFi to JAKi

**eTable 10.** Median Days to Cancer Diagnosis, Number of Incident Cancer Diagnoses (95% CI) per 10,000 Person-Years at Risk, and Adjusted HR (95% CI) Comparing TNFi to JAKi

**eFigure 4.** Adjusted Cox Proportional Hazards Curves for Time to Incident Cancer in Those Treated With TNFi Compared to JAKi

**eTable 11.** Baseline Characteristics Comparing Those Who Were Censored to Those Who Were Diagnosed With Cancer

This supplementary material has been provided by the authors to give readers additional information about their work.

**eTable 1.** Crude Number and Percentages of Treatment Exposure Switches by Drug Class

| <b>Variable</b>                       | <b>TNFi<br/>n = 20,586<br/>(74%)</b> | <b>Rituximab<br/>n = 1,182<br/>(4%)</b> | <b>IL-6i<br/>n = 1,068<br/>(4%)</b> | <b>Abatacept<br/>n = 2,255<br/>(8%)</b> | <b>JAKi<br/>n = 2,570<br/>(9%)</b> |
|---------------------------------------|--------------------------------------|-----------------------------------------|-------------------------------------|-----------------------------------------|------------------------------------|
| # Treatment exposure switches (n (%)) |                                      |                                         |                                     |                                         |                                    |
| Single drug class                     | 18,457 (90)                          | 1023 (87)                               | 535 (50)                            | 1322 (59)                               | 1677 (65)                          |
| Switched 1 time                       | 1850 (9)                             | 127 (11)                                | 361 (34)                            | 710 (31)                                | 751 (29)                           |
| Switched 2 times                      | 248 (1)                              | 27 (2)                                  | 148 (14)                            | 195 (9)                                 | 120 (5)                            |
| Switched 3 times                      | 31 (0)                               | 4 (0)                                   | 24 (2)                              | 28 (1)                                  | 21 (1)                             |
| Switched 4 times                      | 0 (0)                                | 1 (0)                                   | 0 (0)                               | 0 (0)                                   | 1 (0)                              |

**eTable 2.** Number of Incident Cancer Diagnoses per 10,000 Person-Years at Risk (95% CI) by Cancer Type After at Least 90 Days and Within 2 Years of Treatment Exposure by Drug Category

|                                                               | <b>TNFi<br/>n = 20,586<br/>(74%)</b> | <b>Rituximab<br/>n = 1,182<br/>(4%)</b> | <b>IL-6i<br/>n = 1,068<br/>(4%)</b> | <b>Abatacept<br/>n = 2,255<br/>(8%)</b> | <b>JAKi<br/>n = 2,570<br/>(9%)</b> | <b>All Drugs</b> |
|---------------------------------------------------------------|--------------------------------------|-----------------------------------------|-------------------------------------|-----------------------------------------|------------------------------------|------------------|
| <b>Crude n (%) of cancer diagnoses</b>                        | 162 (0.8)                            | 14 (1.2)                                | 8 (0.8)                             | 30 (1.3)                                | 22 (0.9)                           | 236 (0.9)        |
| <b># Cancer/ 10,000 person-years (95% CI)</b>                 | 78 (66-91)                           | 171 (94-285)                            | 88 (38-173)                         | 142 (96-201)                            | 94 (59-143)                        | 87 (77-99)       |
| <b>Crude n (%) of breast cancer</b>                           | 46 (0.2)                             | 2 (0.2)                                 | 1 (0.1)                             | 6 (0.3)                                 | 8 (0.3)                            | 63 (0.2)         |
| <b># Breast cancer/10,000 person-years (95% CI)</b>           | 39 (28-52)                           | 1 (0 ,4)                                | 1 (0-4)                             | 5 (2-10)                                | 7 (3-13)                           | 52 (40-66)       |
| <b>Crude n (%) of myeloid/lymphoid cancer</b>                 | 22 (0.1)                             | 8 (0.7)                                 | 4 (0.4)                             | 8 (0.4)                                 | 3 (0.1)                            | 45 (0.2)         |
| <b># Myeloid/lymphoid cancer/10,000 person-years (95% CI)</b> | 18 (11-27)                           | 5 (2-11)                                | 2 (1-6)                             | 6 (3-13)                                | 2 (0-5)                            | 34 (25-45)       |
| <b>Crude n (%) of lung cancer</b>                             | 14 (0.1)                             | 0                                       | 0                                   | 1 (0)                                   | 4 (0.2)                            | 19 (0.1)         |
| <b># Lung cancer/10,000 person-years (95% CI)</b>             | 14 (8-24)                            | 0                                       | 0                                   | 1 (0-6)                                 | 5 (1-12)                           | 20 (12-31)       |
| <b>Crude n (%) of prostate cancer</b>                         | 11 (0.1)                             | 1 (0.1)                                 | 1 (0.1)                             | 4 (0.2)                                 | 2 (0.1)                            | 19 (0.1)         |
| <b># Prostate cancer/10,000 person-years (95% CI)</b>         | 10 (5-18)                            | 1 (0-5)                                 | 2 (0-9)                             | 3 (1-9)                                 | 2 (0-7)                            | 18 (11-28)       |
| <b>Crude n (%) of genitourinary cancer</b>                    | 11 (0.1)                             | 2 (0.2)                                 | 1 (0.1)                             | 0                                       | 1 (0)                              | 15 (0.1)         |
| <b># Genitourinary cancer/10,000 person-years (95% CI)</b>    | 10 (5-18)                            | 1 (0-2)                                 | 1 (0-5)                             | 0                                       | 0 (0-2)                            | 12 (7-19)        |
| <b>Crude n (%) of colorectal cancer</b>                       | 9 (0)                                | 0                                       | 1 (0.1)                             | 1 (0)                                   | 1 (0)                              | 11 (0)           |
| <b># Colorectal cancer/10,000 person-years (95% CI)</b>       | 8 (4-15)                             | 0                                       | 1 (0-3)                             | 4 (0-25)                                | 2 (0-10)                           | 10 (5-18)        |
| <b>Crude n (%) of other cancer</b>                            | 69 (0.3)                             | 1 (0.1)                                 | 1 (0.1)                             | 14 (0.6)                                | 4 (0.2)                            | 89 (0.3)         |
| <b># Other cancer/10,000 person-years (95% CI)</b>            | 56 (43-71)                           | 1 (0-4)                                 | 1 (0-3)                             | 11 (6-18)                               | 2 (1-5)                            | 70 (56-86)       |

**eTable 3. Baseline Characteristics of the Matched Cohort Comparing TNFi to Rituximab**

| Variable (No. (%)) unless otherwise specified)                            | Matched          |                    |                              |
|---------------------------------------------------------------------------|------------------|--------------------|------------------------------|
|                                                                           | TNFi (n=1122)    | Rituximab (n=1122) | Standardized Mean Difference |
| <b>Demographics</b>                                                       |                  |                    |                              |
| Age in years (median (IQR))                                               | 49 (42-55)       | 49 (41-55)         | 0.01                         |
| Male                                                                      | 229 (20.4%)      | 220 (19.6%)        | 0.02                         |
| Female                                                                    | 893 (79.6%)      | 902 (80.4%)        |                              |
| Geographic region                                                         |                  |                    |                              |
| Northeast                                                                 | 178 (15.9%)      | 183 (16.3%)        |                              |
| North Central                                                             | 221 (19.7%)      | 232 (20.7%)        | 0.00                         |
| South                                                                     | 552 (49.2%)      | 501 (44.7%)        |                              |
| West                                                                      | 146 (13.0%)      | 192 (17.1%)        |                              |
| Unknown                                                                   | 25 (2.2%)        | 14 (1.2%)          |                              |
| Year of treatment exposure (median (IQR))                                 | 2016 (2014-2018) | 2016 (2014-2018)   | -0.05                        |
| <b>Proxies of RA severity</b>                                             |                  |                    |                              |
| ≥1 Fill of glucocorticoids in 3 months prior                              | 500 (44.6%)      | 506 (45.1%)        | 0.01                         |
| ≥1 Fill of csDMARD in 3 months prior                                      | 527 (47.0%)      | 531 (47.3%)        | 0.01                         |
| <b>Clinical characteristics</b>                                           |                  |                    |                              |
| Days from RA diagnosis to treatment exposure (median (IQR))               | 570 (300-1230)   | 660 (350-1270)     | -0.01                        |
| Tobacco use                                                               | 79 (7.0%)        | 90 (8.0%)          | 0.04                         |
| Frailty score (0 [not at all frail] to 1 [severely frail]) (median (IQR)) | 0.14 (0.12-0.17) | 0.14 (0.12-0.17)   | 0.03                         |
| Charlson co-morbidity score                                               |                  |                    |                              |
| 1-2                                                                       | 894 (79.7%)      | 873 (77.8%)        |                              |
| 3-4                                                                       | 161 (14.3%)      | 198 (17.6%)        | 0.02                         |
| 5+                                                                        | 67 (6.0%)        | 51 (4.5%)          |                              |
| <b>Healthcare utilization in 12 months prior</b>                          |                  |                    |                              |
| ≥1 Hospital admission                                                     | 225 (20.1%)      | 206 (18.4%)        | -0.05                        |
| ≥1 Emergency department visit                                             | 416 (37.1%)      | 416 (37.1%)        | 0.00                         |
| ≥1 Outpatient visit                                                       | 1,122 (100%)     | 1,122 (100%)       | 0.01                         |
| ≥1 Opioid prescription fill                                               | 408 (36.4%)      | 418 (37.3%)        | 0.02                         |
| ≥1 NSAID prescription fill                                                | 431 (38.4%)      | 409 (36.5%)        | -0.04                        |
| <b>Reason for end of follow-up</b>                                        |                  |                    |                              |
| Enrollment ended                                                          | 424 (37.8%)      | 236 (21.0%)        |                              |
| Did not refill in 90/180 days                                             | 521 (46.4%)      | 865 (77.1%)        |                              |
| Switched to allowed drug category                                         | 172 (15.3%)      | 6 (0.5%)           |                              |
| Switched to not allowed drug category                                     | 0                | 2 (0.2%)           |                              |
| Cancer Outcome                                                            | 5 (0.5%)         | 13 (1.2%)          |                              |
| <b>Days of follow-up (median (IQR))</b>                                   | 290 (170-510)    | 190 (180-260)      |                              |

**eTable 4.** Median Days to Cancer Diagnosis, Number of Incident Cancer Diagnoses (95% CI) per 10,000 Person-Years at Risk, and Adjusted HR (95% CI) Comparing TNFi to Rituximab

|           | <b>Median (IQR) days to cancer diagnosis</b> | <b>n (%) of cancer diagnoses</b> | <b># of cancer diagnoses/ 10,000 person-years (95% CI)</b> | <b>Adjusted* HR (95% CI)</b> |
|-----------|----------------------------------------------|----------------------------------|------------------------------------------------------------|------------------------------|
| TNFi      | 172 (139-204)                                | 5 (0.5%)                         | 46 (15-107)                                                | Referent                     |
| Rituximab | 221 (157-303)                                | 13 (1.2%)                        | 166 (89-282)                                               | 4.4 (1.5, 12.8)              |

\* Adjusted for demographics (age, sex, region, year of initiating biologic), proxies of RA severity (glucocorticoid and csDMARDs prescription fills and number of drug switches), clinical characteristics (days from RA diagnosis to biologic initiation, tobacco use, frailty status, Charlson comorbidity score), and healthcare utilization in the 12 months prior to starting treatment (hospital admissions, emergency department visits, outpatient visits, opioid fills, and NSAID fills).

**eFigure 1.** Adjusted Cox Proportional Hazards Curves for Time to Incident Cancer in Those Treated With TNFi Compared to Rituximab

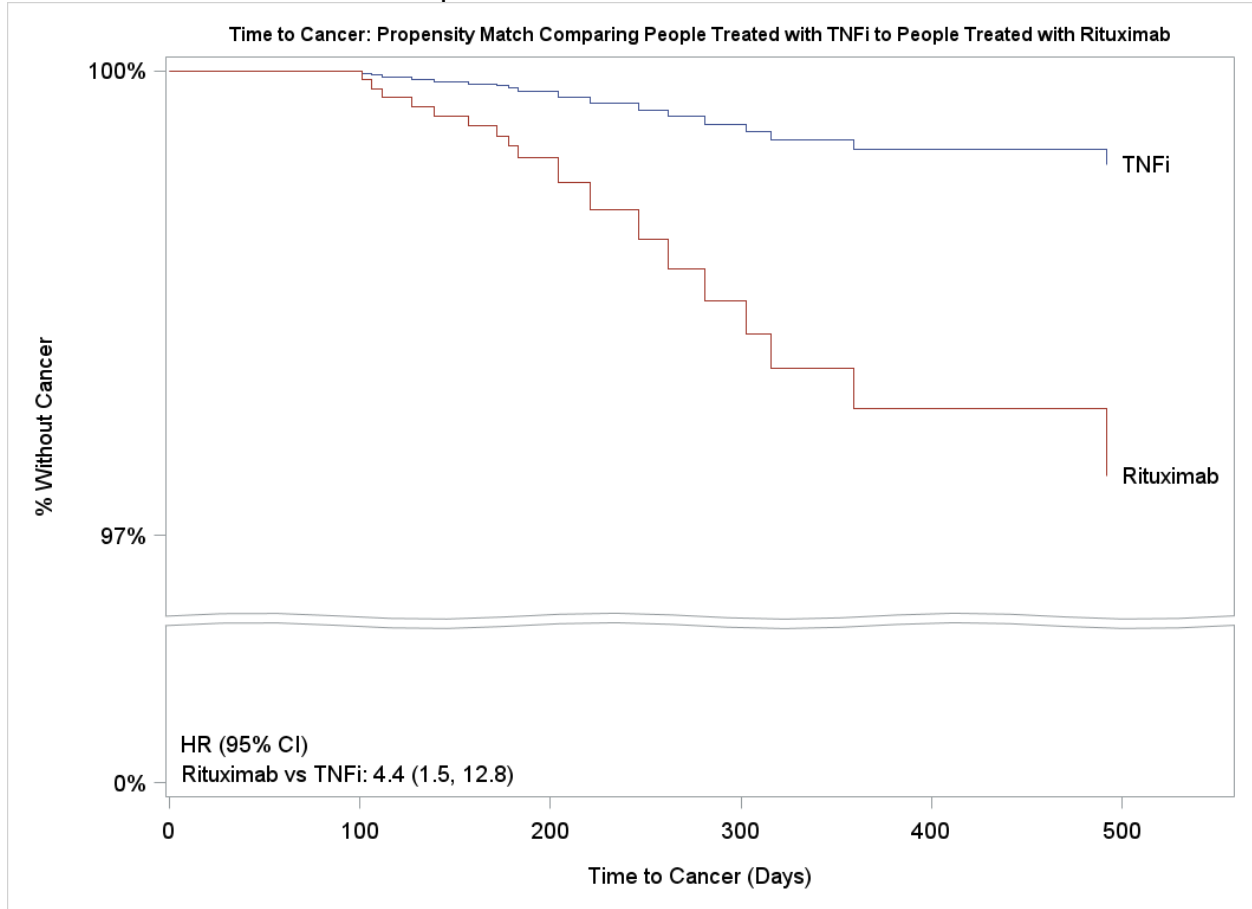

**eTable 5.** Baseline Characteristics of the Matched Cohort Comparing TNFi to Interleukin-6 Inhibitors (IL-6i)

| Variable (No. (%)) unless otherwise specified)                            | Matched          |                                  |                              |
|---------------------------------------------------------------------------|------------------|----------------------------------|------------------------------|
|                                                                           | TNFi (n=977)     | Interleukin-6 inhibitors (n=977) | Standardized Mean Difference |
| <b>Demographics</b>                                                       |                  |                                  |                              |
| Age in years (median (IQR))                                               | 50 (42-56)       | 50 (42-56)                       | 0.00                         |
| Male                                                                      | 185 (18.9%)      | 205 (21.0%)                      | -0.05                        |
| Female                                                                    | 792 (81.1%)      | 772 (79.0%)                      |                              |
| Geographic region                                                         |                  |                                  |                              |
| Northeast                                                                 | 115 (11.8%)      | 138 (14.1%)                      |                              |
| North Central                                                             | 191 (19.5%)      | 199 (20.4%)                      | -0.03                        |
| South                                                                     | 519 (53.1%)      | 458 (46.9%)                      |                              |
| West                                                                      | 136 (13.9%)      | 168 (17.2%)                      |                              |
| Unknown                                                                   | 16 (1.6%)        | 14 (1.4%)                        |                              |
| Year of treatment exposure (median (IQR))                                 | 2016 (2014-2019) | 2016 (2014-2018)                 | -0.02                        |
| <b>Proxies of RA severity</b>                                             |                  |                                  |                              |
| ≥1 Fill of glucocorticoids in 3 months prior                              | 422 (43.2%)      | 436 (44.6%)                      | 0.03                         |
| ≥1 Fill of csDMARD in 3 months prior                                      | 468 (47.9%)      | 510 (52.2%)                      | 0.09                         |
| <b>Clinical characteristics</b>                                           |                  |                                  |                              |
| Days from RA diagnosis to treatment exposure (median (IQR))               | 560 (250-1270)   | 650 (370-1190)                   | -0.04                        |
| Tobacco use                                                               | 58 (5.9%)        | 71 (7.3%)                        | 0.05                         |
| Frailty score (0 [not at all frail] to 1 [severely frail]) (median (IQR)) | 0.14 (0.12-0.17) | 0.14 (0.12-0.16)                 | -0.02                        |
| Charlson co-morbidity score                                               |                  |                                  |                              |
| 1-2                                                                       | 832 (85.2%)      | 814 (83.3%)                      | -0.02                        |
| 3-4                                                                       | 89 (9.1%)        | 122 (12.5%)                      |                              |
| 5+                                                                        | 56 (5.7%)        | 41 (4.2%)                        |                              |
| <b>Healthcare utilization in 12 months prior</b>                          |                  |                                  |                              |
| ≥1 Hospital admission                                                     | 105 (10.7%)      | 108 (11.1%)                      | 0.01                         |
| ≥1 Emergency department visit                                             | 309 (31.6%)      | 305 (31.2%)                      | -0.01                        |
| ≥1 Outpatient visit                                                       | 977 (100%)       | 977 (100%)                       | -0.03                        |
| ≥1 Opioid prescription fill                                               | 375 (38.4%)      | 386 (39.5%)                      | 0.02                         |
| ≥1 NSAID prescription fill                                                | 454 (46.5%)      | 472 (48.3%)                      | 0.04                         |
| <b>Reason for end of follow-up</b>                                        |                  |                                  |                              |
| Enrollment ended                                                          | 234 (24.0%)      | 333 (34.1%)                      |                              |
| Did not refill in 90/180 days                                             | 320 (32.8%)      | 452 (46.3%)                      |                              |
| Switched to allowed drug category                                         | 421 (43.1%)      | 142 (14.5%)                      |                              |
| Switched to not allowed drug category                                     | 0                | 42 (4.3%)                        |                              |
| Cancer Outcome                                                            | 2 (0.2%)         | 8 (0.8%)                         |                              |
| Days of follow-up (median (IQR))                                          | 280 (170-480)    | 240 (150-420)                    |                              |

**eTable 6.** Median Days to Cancer Diagnosis, Number of Incident Cancer Diagnoses (95% CI) per 10,000 Person-Years at Risk, and Adjusted HR (95% CI) Comparing TNFi to Interleukin-6 Inhibitors (IL-6i)

|                                     | <b>Median (IQR)<br/>days to cancer<br/>diagnosis</b> | <b>n (%) of cancer<br/>diagnoses</b> | <b># of cancer diagnoses/<br/>10,000 person-years<br/>(95% CI)</b> | <b>Adjusted*<br/>HR (95% CI)</b> |
|-------------------------------------|------------------------------------------------------|--------------------------------------|--------------------------------------------------------------------|----------------------------------|
| TNFi                                | 242 (208-276)                                        | 2 (0.2%)                             | 22 (3-78)                                                          | Referent                         |
| Interleukin-6<br>inhibitors (IL-6i) | 231 (199-299)                                        | 8 (0.8%)                             | 96 (41-188)                                                        | 5.7 (1.1-28.8)                   |

\* Adjusted for demographics (age, sex, region, year of initiating biologic), proxies of RA severity (glucocorticoid and csDMARDs prescription fills and number of drug switches), clinical characteristics (days from RA diagnosis to biologic initiation, tobacco use, frailty status, Charlson comorbidity score), and healthcare utilization in the 12 months prior to starting treatment (hospital admissions, emergency department visits, outpatient visits, opioid fills, and NSAID fills).



**eFigure 2.** Adjusted Cox Proportional Hazards Curves for Time to Incident Cancer in Those Treated With TNFi Compared to Interleukin-6 Inhibitors (IL-6i)

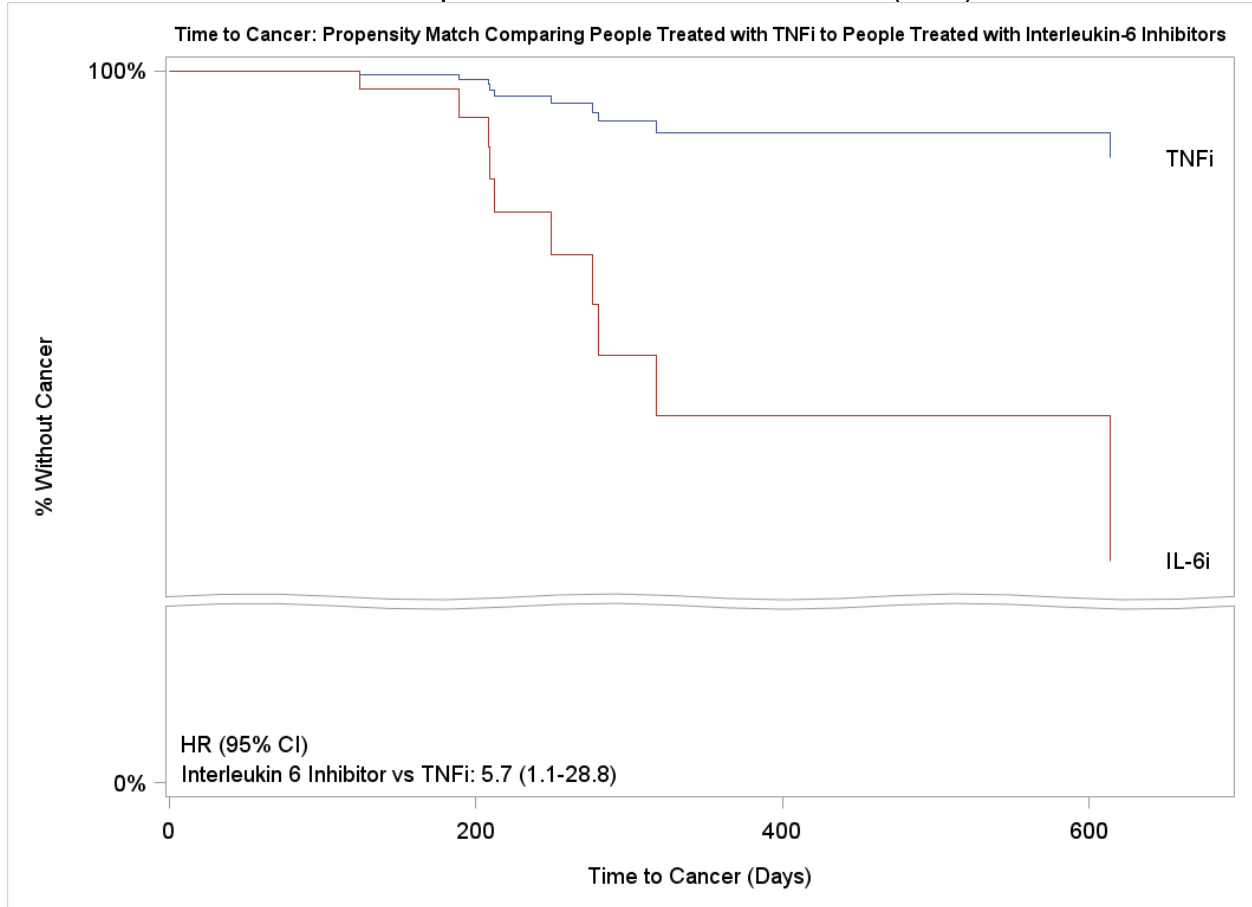

**eTable 7.** Baseline Characteristics of the Matched Cohort Comparing TNFi to Abatacept

| Variable (No. (%)) unless otherwise specified)                            | Matched          |                    |                              |
|---------------------------------------------------------------------------|------------------|--------------------|------------------------------|
|                                                                           | TNFi (n=2143)    | Abatacept (n=2143) | Standardized Mean Difference |
| <b>Demographics</b>                                                       |                  |                    |                              |
| Age in years (median (IQR))                                               | 50 (43-55)       | 50 (43-56)         | 0.01                         |
| Male                                                                      | 306 (14.3%)      | 340 (15.9%)        |                              |
| Female                                                                    | 1,837 (85.7%)    | 1,803 (84.1%)      | -0.04                        |
| Geographic region                                                         |                  |                    |                              |
| Northeast                                                                 | 268 (12.5%)      | 301 (14.0%)        |                              |
| North Central                                                             | 431 (20.1%)      | 410 (19.1%)        | -0.02                        |
| South                                                                     | 1,097 (51.2%)    | 1,069 (49.9%)      |                              |
| West                                                                      | 318 (14.8%)      | 335 (15.6%)        |                              |
| Unknown                                                                   | 29 (1.4%)        | 28 (1.3%)          | -0.05                        |
| Year of treatment exposure (median (IQR))                                 | 2016 (2014-2018) | 2016 (2014-2018)   |                              |
| <b>Proxies of RA severity</b>                                             |                  |                    |                              |
| ≥1 Fill of glucocorticoids in 3 months prior                              | 900 (42.0%)      | 931 (43.4%)        | 0.03                         |
| ≥1 Fill of csDMARD in 3 months prior                                      | 1,283 (59.9%)    | 1,322 (61.7%)      | 0.04                         |
| <b>Clinical characteristics</b>                                           |                  |                    |                              |
| Days from RA diagnosis to treatment exposure (median (IQR))               | 540 (260-1270)   | 640 (360-1180)     | -0.03                        |
| Tobacco use                                                               | 145 (6.8%)       | 160 (7.5%)         | 0.03                         |
| Frailty score (0 [not at all frail] to 1 [severely frail]) (median (IQR)) | 0.14 (0.12-0.16) | 0.14 (0.12-0.16)   | -0.03                        |
| Charlson co-morbidity score                                               |                  |                    | -0.02                        |
| 1-2                                                                       | 1,797 (83.9%)    | 1,794 (83.7%)      |                              |
| 3-4                                                                       | 247 (11.5%)      | 273 (12.7%)        |                              |
| 5+                                                                        | 99 (4.6%)        | 76 (3.5%)          |                              |
| <b>Healthcare utilization in 12 months prior</b>                          |                  |                    |                              |
| ≥1 Hospital admission                                                     | 220 (10.3%)      | 212 (9.9%)         | -0.01                        |
| ≥1 Emergency department visit                                             | 654 (30.5%)      | 634 (29.6%)        | -0.02                        |
| ≥1 Outpatient visit                                                       | 2,142 (100%)     | 2,143 (100%)       | -0.02                        |
| ≥1 Opioid prescription fill                                               | 835 (39.0%)      | 868 (40.5%)        | 0.03                         |
| ≥1 NSAID prescription fill                                                | 1,085 (50.6%)    | 1,097 (51.2%)      | 0.01                         |
| <b>Reason for end of follow-up</b>                                        |                  |                    |                              |
| Enrollment ended                                                          | 601 (28.0%)      | 831 (38.8%)        |                              |
| Did not refill in 90/180 days                                             | 765 (35.7%)      | 851 (39.7%)        |                              |
| Switched to allowed drug category                                         | 767 (35.8%)      | 305 (14.2%)        |                              |
| Switched to not allowed drug category                                     | 0                | 126 (5.9%)         |                              |
| Cancer Outcome                                                            | 10 (0.5%)        | 30 (1.4%)          |                              |
| Days of follow-up (median (IQR))                                          | 290 (180-530)    | 260 (170-520)      |                              |

**eTable 8.** Median Days to Cancer Diagnosis, Number of Incident Cancer Diagnoses (95% CI) per 10,000 Person-Years at Risk, and Adjusted HR (95% CI) Comparing TNFi to Abatacept

|           | <b>Median (IQR) days to cancer diagnosis</b> | <b>n (%) of cancer diagnoses</b> | <b># of cancer diagnoses/ 10,000 person-years (95% CI)</b> | <b>Adjusted* HR (95% CI)</b> |
|-----------|----------------------------------------------|----------------------------------|------------------------------------------------------------|------------------------------|
| TNFi      | 196 (148-276)                                | 10 (0.5%)                        | 48 (23-87)                                                 | Referent                     |
| Abatacept | 289 (150-373)                                | 30 (1.4%)                        | 148 (100-211)                                              | 3.1 (1.5-6.4)                |

\* Adjusted for demographics (age, sex, region, year of initiating biologic), proxies of RA severity (glucocorticoid and csDMARDs prescription fills and number of drug switches), clinical characteristics (days from RA diagnosis to biologic initiation, tobacco use, frailty status, Charlson comorbidity score), and healthcare utilization in the 12 months prior to starting treatment (hospital admissions, emergency department visits, outpatient visits, opioid fills, and NSAID fills).

**eFigure 3.** Adjusted Cox Proportional Hazards Curves for Time to Incident Cancer in Those Treated With TNFi Compared to Abatacept

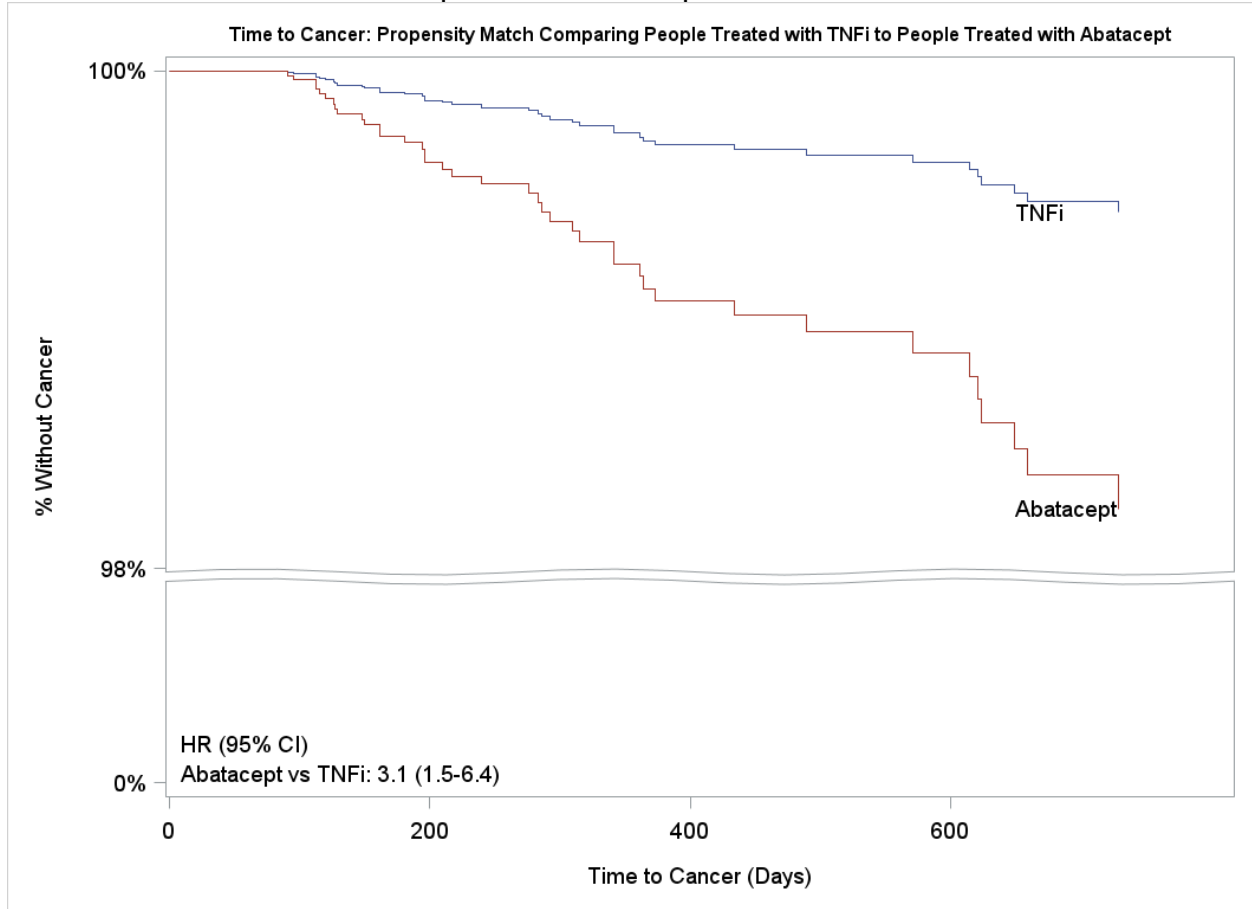

**eTable 9.** Baseline Characteristics of the Matched Cohort Comparing TNFi to JAKi

| Variable (No. (%)) unless otherwise specified)                            | Matched          |                  |                              |
|---------------------------------------------------------------------------|------------------|------------------|------------------------------|
|                                                                           | TNFi (n=2421)    | JAKi (n=2421)    | Standardized Mean Difference |
| <b>Demographics</b>                                                       |                  |                  |                              |
| Age in years (median (IQR))                                               | 50 (43-56)       | 50 (43-56)       | -0.01                        |
| Male                                                                      | 463 (19.1%)      | 470 (19.4%)      | -0.01                        |
| Female                                                                    | 1,958 (80.9%)    | 1,951 (80.6%)    |                              |
| Geographic region                                                         |                  |                  |                              |
| Northeast                                                                 | 308 (12.7%)      | 376 (15.5%)      | 0.00                         |
| North Central                                                             | 506 (20.9%)      | 438 (18.1%)      |                              |
| South                                                                     | 1,304 (53.9%)    | 1,238 (51.1%)    |                              |
| West                                                                      | 291 (12.0%)      | 358 (14.8%)      |                              |
| Unknown                                                                   | 12 (0.5%)        | 11 (0.5%)        |                              |
| Year of treatment exposure (median (IQR))                                 | 2018 (2016-2020) | 2018 (2016-2020) | -0.01                        |
| <b>Proxies of RA severity</b>                                             |                  |                  |                              |
| ≥1 Fill of glucocorticoids in 3 months prior                              | 1,040 (43.0%)    | 1,033 (42.7%)    | -0.01                        |
| ≥1 Fill of csDMARD in 3 months prior                                      | 1,644 (67.9%)    | 1,624 (67.1%)    | -0.02                        |
| <b>Clinical characteristics</b>                                           |                  |                  |                              |
| Days from RA diagnosis to treatment exposure (median (IQR))               | 580 (310-1270)   | 690 (390-1260)   | 0.01                         |
| Tobacco use                                                               | 162 (6.7%)       | 169 (7.0%)       | 0.01                         |
| Frailty score (0 [not at all frail] to 1 [severely frail]) (median (IQR)) | 0.13 (0.12-0.16) | 0.13 (0.12-0.16) | -0.03                        |
| Charlson co-morbidity score                                               |                  |                  |                              |
| 1-2                                                                       | 2,120 (87.6%)    | 2,121 (87.6%)    | 0.02                         |
| 3-4                                                                       | 248 (10.2%)      | 232 (9.6%)       |                              |
| 5+                                                                        | 53 (2.2%)        | 68 (2.8%)        |                              |
| Healthcare utilization in 12 months prior                                 |                  |                  |                              |
| ≥1 Hospital admission                                                     | 190 (7.8%)       | 190 (7.8%)       | 0.00                         |
| ≥1 Emergency department visit                                             | 603 (24.9%)      | 572 (23.6%)      | -0.03                        |
| ≥1 Outpatient visit                                                       | 2,420 (100%)     | 2,420 (100%)     | 0.00                         |
| ≥1 Opioid prescription fill                                               | 824 (34.0%)      | 824 (34.0%)      | 0.00                         |
| ≥1 NSAID prescription fill                                                | 1,372 (56.7%)    | 1,352 (55.8%)    | -0.02                        |
| <b>Reason for end of follow-up</b>                                        |                  |                  |                              |
| Enrollment ended                                                          | 908 (37.5%)      | 979 (40.4%)      |                              |
| Did not refill in 90/180 days                                             | 851 (35.2%)      | 1084 (44.8%)     |                              |
| Switched to allowed drug category                                         | 648 (26.8%)      | 176 (7.3%)       |                              |
| Switched to not allowed drug category                                     | 0                | 160 (6.6%)       |                              |
| Cancer Outcome                                                            | 14 (0.6%)        | 22 (0.9%)        |                              |
| Days of follow-up (median (IQR))                                          | 290 (180-500)    | 270 (170-460)    |                              |

**eTable 10.** Median Days to Cancer Diagnosis, Number of Incident Cancer Diagnoses (95% CI) per 10,000 Person-Years at Risk, and Adjusted HR (95% CI) Comparing TNFi to JAKi

|      | <b>Median (IQR) days to cancer diagnosis</b> | <b>n (%) of cancer diagnoses</b> | <b># of cancer diagnoses/ 10,000 person-years (95% CI)</b> | <b>Adjusted* HR (95% CI)</b> |
|------|----------------------------------------------|----------------------------------|------------------------------------------------------------|------------------------------|
| TNFi | 238 (154-420)                                | 14 (0.6%)                        | 60 (33-101)                                                | Referent                     |
| JAKi | 276 (169-351)                                | 22 (0.9%)                        | 100 (63-151)                                               | 1.8 (0.9-3.6)                |

\* Adjusted for demographics (age, sex, region, year of initiating biologic), proxies of RA severity (glucocorticoid and csDMARDs prescription fills and number of drug switches), clinical characteristics (days from RA diagnosis to biologic initiation, tobacco use, frailty status, Charlson comorbidity score), and healthcare utilization in the 12 months prior to starting treatment (hospital admissions, emergency department visits, outpatient visits, opioid fills, and NSAID fills).

**eFigure 4.** Adjusted Cox Proportional Hazards Curves for Time to Incident Cancer in Those Treated With TNFi Compared to JAKi

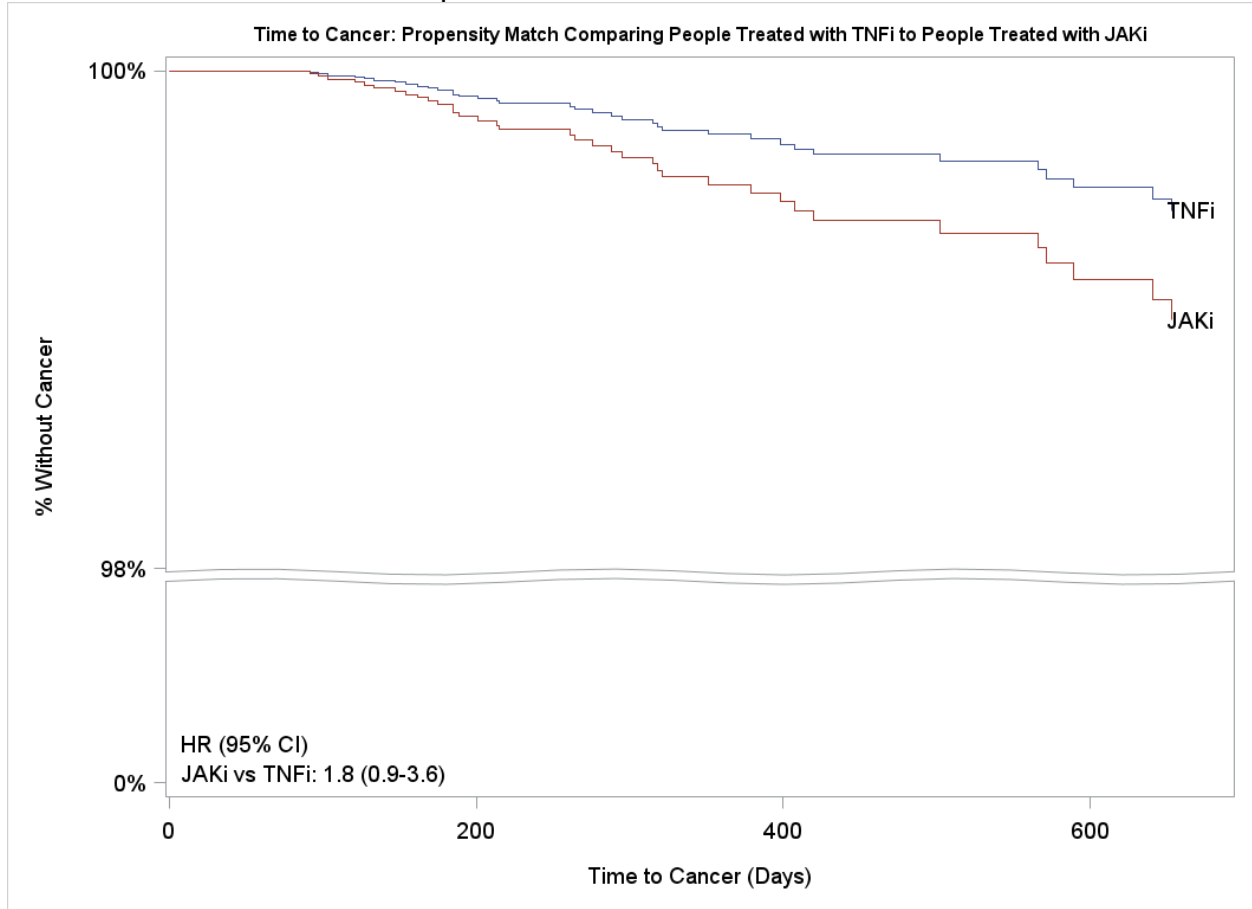

**eTable 11.** Baseline Characteristics Comparing Those Who Were Censored to Those Who Were Diagnosed With Cancer

| <b>Variable (No. (%)) unless otherwise specified)</b>                     | <b>Censored (n=27,425)</b> | <b>Cancer diagnosis (n=236)</b> |
|---------------------------------------------------------------------------|----------------------------|---------------------------------|
| <b>Demographics</b>                                                       |                            |                                 |
| Age in years (median (IQR))                                               | 50 (42-55)                 | 53 (48-58)                      |
| Male                                                                      | 5,777 (21.1%)              | 65 (27.5%)                      |
| Female                                                                    | 21,648 (78.9%)             | 171 (72.5%)                     |
| Geographic region                                                         |                            |                                 |
| Northeast                                                                 | 3,745 (13.7%)              | 35 (14.8%)                      |
| North Central                                                             | 5,538 (20.2%)              | 44 (18.6%)                      |
| South                                                                     | 13,596 (49.6%)             | 119 (50.4%)                     |
| West                                                                      | 4,192 (15.3%)              | 35 (14.8%)                      |
| Unknown                                                                   | 354 (1.3%)                 | 3 (1.3%)                        |
| Year of treatment exposure (median (IQR))                                 | 2016 (2014-2018)           | 2016 (2014-2018)                |
| <b>Proxies of RA severity</b>                                             |                            |                                 |
| ≥1 Fill of glucocorticoids in 3 months prior                              | 12,544 (45.7%)             | 118 (50.0%)                     |
| ≥1 Fill of csDMARD in 3 months prior                                      | 18,815 (68.6%)             | 172 (72.9%)                     |
| <b>Clinical characteristics</b>                                           |                            |                                 |
| Days from RA diagnosis to treatment exposure (median (IQR))               | 520 (270-1050)             | 510 (240-1160)                  |
| Tobacco use                                                               | 2,055 (7.5%)               | 18 (7.6%)                       |
| Frailty score (0 [not at all frail] to 1 [severely frail]) (median (IQR)) | 0.13 (0.12-0.16)           | 0.14 (0.12-0.17)                |
| Charlson co-morbidity score                                               |                            |                                 |
| 1-2                                                                       | 23,888 (87.1%)             | 191 (80.9%)                     |
| 3-4                                                                       | 2,789 (10.2%)              | 35 (14.8%)                      |
| 5+                                                                        | 748 (2.7%)                 | 10 (4.2%)                       |
| <b>Healthcare utilization in 12 months prior</b>                          |                            |                                 |
| ≥1 Hospital admission                                                     | 2,442 (8.9%)               | 29 (12.3%)                      |
| ≥1 Emergency department visit                                             | 7,423 (27.1%)              | 63 (26.7%)                      |
| ≥1 Outpatient visit                                                       | 27,410 (99.9%)             | 236 (100%)                      |
| ≥1 Opioid prescription fill                                               | 10,607 (38.7%)             | 98 (41.5%)                      |
| ≥1 NSAID prescription fill                                                | 14,880 (54.3%)             | 139 (58.9%)                     |
| <b>Drug Treatment Category</b>                                            |                            |                                 |
| TNFi                                                                      | 20,424 (74.5%)             | 162 (68.6%)                     |
| Rituximab                                                                 | 1,168 (4.3%)               | 14 (5.9%)                       |
| IL-6i                                                                     | 1,060 (3.9%)               | 8 (3.4%)                        |
| Abatacept                                                                 | 2,225 (8.1%)               | 30 (12.7%)                      |
| JAKi                                                                      | 2,548 (9.3%)               | 22 (9.3%)                       |
| Days of follow-up (median (IQR))                                          | 280 (180-520)              | 450 (260-700)                   |
