# Supplementary material for: Use of Biologic or Targeted Synthetic Disease-Modifying Antirheumatic Drugs and Cancer Risk
Source: PubMed Central journal article supplement (PMC11579790; doi:10.1001/jamanetworkopen.2024.46336), 2024-11-20
Supplement: jamanetwopen-e2446336-s002.pdf [file jamanetwopen-e2446336-s002.pdf]

## Data Sharing Statement

Sendaydiego. Use of Biologic or Targeted Synthetic Disease-Modifying Antirheumatic Drugs and Cancer Risk. *JAMA Netw Open*. Published November 20, 2024.

doi:10.1001/jamanetworkopen.2024.46336

### Data

**Data available:** No
